# Supplementary material for: Molecular identification and expression patterns of odorant binding protein and chemosensory protein genes in Athetis lepigone (Lepidoptera: Noctuidae)
Source: PeerJ. 2017 Mar 30;5:e3157. doi: 10.7717/peerj.3157 (PMC5376112; doi:10.7717/peerj.3157)
Supplement: Data S1 [file peerj-05-3157-s001.xlsx]

## Sheet: Sheet1
Raw data of Fig.3 and Fig.4
BR: Biological Replication
GOBP1	BR1	BR2	BR3		OBP8	BR1	BR2	BR3		OBP20	BR1	BR2	BR3		CSP9	BR1	BR2	BR3
FA	76.7023	64.7461	58.5651		FA	0.0172677	0.010723	0.0122336		FA	0.30248	0.445773	0.373232		FA	1.05161	0.444243	0.303881
MA	58.9091	54.8692	84.7869		MA	0.00904733	0.0202217	0.0242572		MA	0.543846	0.73373	0.432922		MA	3.6327	5.45667	1.94034
Pr	0.570926	1.06035	0.583715		Pr	0.244717	0.243381	0.160869		Pr	0.00746792	0.00324964	0.00569453		Pr	22.4546	15.335	33.9937
Ab	0.000853154	0.000387085	0.000295823		Ab	0.0242109	0.00787562	0.0308729		Ab	0.000562302	0.00021926	0.000470126		Ab	1.3397	0.552331	0.856736
Le	0.00260581	0.00216485	0.0195383		Le	0.000325994	0.000185188	0.000728568		Le	0.000462791	9.45308e-05	0.00053397		Le	3.20508	1.81425	4.58901
Wi	0.0277843	0.0176029	0.0254942		Wi	0.000913821	0.000692519	0.000800496		Wi	0.000670742	0.000521464	0.000636321		Wi	18.8094	8.83606	14.5978
GOBP2					OBP9					OBP21					CSP10
FA	4.04645	4.38433	2.74909		FA	0.00217361	0.00296164	0.00563823		FA	0.000979676	0.00269073	0.00155528		FA	0.519852	0.751562	0.305988
MA	2.04965	3.7074	3.66752		MA	0.00677238	0.00823966	0.00579605		MA	0.00113095	0.00147568	0.00140987		MA	0.898703	1.70585	0.695516
Pr	0.000732298	0.00121658	0.000605833		Pr	0.00478742	0.00523575	0.00384524		Pr	0.0065715	0.00480563	0.00338139		Pr	1.1374	0.849984	0.975924
Ab	0	0	0		Ab	0.000138502	0.000271822	0.000394967		Ab	0.00426542	0.00265956	0.00184712		Ab	2.14072	2.04245	2.4904
Le	0.0021919	0.00224481	0.00470017		Le	0.0264113	0.0211052	0.0289143		Le	0.00118105	0.000711953	0.00170279		Le	6.0506	2.88829	4.30421
Wi	0.0416438	0.019698	0.0308964		Wi	0.121619	0.13105	0.130577		Wi	0.00264981	0.00126158	0.00121776		Wi	8.16822	4.43146	4.31288
PBP1					OBP10					OBP22					CSP11
FA	20.9139	14.566	17.3666		FA	0.102101	0.32278	0.25801		FA	0.0237695	0.0455365	0.0217703		FA	0.0177935	0.0394511	0.0208975
MA	53.4209	111.558	59.5661		MA	0.345234	0.301929	0.189661		MA	0.0173429	0.0420862	0.0336811		MA	0.0150484	0.0416007	0.018823
Pr	0.0532214	0.0722466	0.036933		Pr	0.129151	0.108798	0.110417		Pr	0.404991	0.280603	0.200448		Pr	0.00918964	0.0058168	0.0130827
Ab	0	0	0		Ab	1.07835	0.728449	1.56293		Ab	0.0113004	0.00659191	0.00451758		Ab	0.00899704	0.00517394	0.0117221
Le	0.00206025	0.000100061	0.00367704		Le	0.16504	0.0988066	0.130004		Le	0.00183908	0.000861032	0.00142928		Le	0.0138379	0.00745212	0.0141502
Wi	0.0252572	0.011636	0.0307768		Wi	0.263989	0.188736	0.232026		Wi	0.00321902	0.0011274	0.000588188		Wi	0.0334485	0.0200126	0.0233999
PBP2					OBP11					OBP23					CSP12
FA	3.86122	5.90489	5.39389		FA	0.00420922	0.00887724	0.00543583		FA	0.000772586	0.000916517	0.000386066		FA	0.0213031	0.0317446	0.0196621
MA	14.7498	7.54536	12.2587		MA	0.00265539	0.00133712	0.00121262		MA	0.00170047	0.0021215	0.000747982		MA	0.0284449	0.0502085	0.0190739
Pr	0.0058376	0.00555562	0.0025285		Pr	0.223409	0.175543	0.156284		Pr	0.132479	0.0821909	0.0747189		Pr	52.8682	44.7728	33.4492
Ab	0	0	0		Ab	0.000418762	0.000196243	0.00070277		Ab	0.0605905	0.0461253	0.0634975		Ab	0.474248	0.122897	0.165558
Le	0.000611811	0.000810428	0.0015389		Le	0.0145443	0.00566533	0.0100643		Le	0.0030211	0.00690526	0.00286501		Le	0.990983	0.381924	0.678822
Wi	0.0112312	0.00580904	0.00837098		Wi	0.00524159	0.00756827	0.0135419		Wi	0.0100179	0.00569131	0.00488962		Wi	0.616616	0.348125	0.530658
PBP3					OBP12					CSP1					CSP13
FA	0.418776	0.637122	0.792716		FA	4.14312	11.891	9.62639		FA	1.0887	2.70357	1.92036		FA	0.00249616	0.00767264	0.00434211
MA	0.760683	0.403137	0.867092		MA	7.4321	7.78996	9.34648		MA	3.8144	4.89731	2.87569		MA	0.00327828	0.00716672	0.00286745
Pr	0.0132829	0.0100133	0.00701559		Pr	0.848466	0.94713	0.394909		Pr	33.0505	22.3135	18.5544		Pr	0.00640857	0.00450093	0.00294766
Ab	0.000594363	0.000717033	0.000891926		Ab	0.000719332	0.000933107	0.000618311		Ab	2.15176	0.485046	0.858845		Ab	0.00411086	0.00146321	0.00486773
Le	0	0	0		Le	0.00805955	0.00655823	0.00927467		Le	6.76115	2.63504	4.50992		Le	0.0130587	0.00555165	0.00718246
Wi	0	0	0		Wi	0.0411704	0.0307485	0.0258867		Wi	10.3647	5.6808	6.40172		Wi	0.0206059	0.0130101	0.0301809
OBP1					OBP13					CSP2					CSP14
FA	0.0368763	0.100847	0.0689599		FA	0.00721348	0.0180537	0.00698315		FA	0.183782	0.113523	0.145774		FA	18.5763	48.3602	41.0878
MA	0.020986	0.0118826	0.00775489		MA	0.00944564	0.00655598	0.00573985		MA	0.355976	0.415498	0.158218		MA	34.2392	34.7339	16.986
Pr	0.00162889	0.0011041	0.0010864		Pr	0.000662388	0.000286089	0.000965666		Pr	0.0515796	0.0528685	0.0374414		Pr	0.000999987	0.00132888	0.00084066
Ab	0	0	0		Ab	0.000808835	0.000918308	0.000745925		Ab	0.0216853	0.0339639	0.0178344		Ab	0.000842395	0.000473434	0.0011607
Le	0.00119229	0.000909366	0.00236808		Le	0.00356158	0.00326907	0.00386204		Le	0.0140205	0.00610502	0.00759984		Le	18.8259	17.6974	25.2498
Wi	0.00370839	0.00342655	0.00313655		Wi	0.0110311	0.0178964	0.0159073		Wi	0.019798	0.00938306	0.020263		Wi	67.1187	49.8949	37.8321
OBP2					OBP14					CSP3					CSP15
FA	0.00540107	0.00257122	0.00185343		FA	0.0092928	0.0187271	0.0081555		FA	0.000378864	0.000962564	0.000327143		FA	0.0200585	0.0375924	0.0204579
MA	0.0159053	0.0130915	0.00574372		MA	0.0130719	0.0192728	0.00880712		MA	0.000346024	0.000269442	0.000339701		MA	0.0480748	0.0598532	0.0255163
Pr	0.000295309	0.000263233	0.000325232		Pr	0.354307	0.401158	0.38999		Pr	0	0	0		Pr	3.44073	2.11393	1.36938
Ab	0.000413512	0.000197678	0.000449063		Ab	0.0859107	0.0573051	0.0908102		Ab	0	0	0		Ab	0.0545226	0.0109993	0.0349408
Le	0.00239865	0.00549249	0.00709774		Le	0.0212359	0.0140237	0.0353931		Le	0.000759263	0.000851145	0.000548015		Le	0.0229139	0.0210651	0.0304576
Wi	0.0355795	0.0371877	0.0422659		Wi	0.0299734	0.0136055	0.0123585		Wi	0.00381832	0.00174916	0.00188647		Wi	0.0695426	0.0552177	0.0707957
OBP3					OBP15					CSP4					CSP16
FA	1.68087	1.04491	0.89859		FA	0.00372265	0.00419026	0.00936578		FA	0.00386214	0.0095455	0.007142		FA	0.000231453	0.000504053	0.000297167
MA	0.731153	0.671842	0.339136		MA	0.00837084	0.00513466	0.0110191		MA	0.00783848	0.0189166	0.00768241		MA	0.000310532	0.000463489	0.000193136
Pr	0.196238	0.134806	0.0620278		Pr	0.00922685	0.0117313	0.00791163		Pr	0.000289231	0.000254124	0.000248194		Pr	0.329433	0.291322	0.153385
Ab	0.000486064	5.15175e-05	0.0004443		Ab	0.00123065	0.00101404	0.000531642		Ab	0.000247505	0.000123287	0.000237973		Ab	0	0	0
Le	0.00623511	0.00101111	0.00435333		Le	0.00205361	0.00232651	0.00181794		Le	0.0203186	0.00517837	0.0119891		Le	0.000156045	0.000165124	0.000207094
Wi	0.00252554	0.000487954	0.000610297		Wi	0.00762115	0.0040277	0.00988657		Wi	0.0686872	0.0649708	0.0737506		Wi	0.000471451	0.000325149	0.000245958
OBP4					OBP16					CSP5					CSP17
FA	0.0204088	0.0414703	0.026588		FA	0.773333	0.838731	0.639144		FA	0.000136243	0.000225088	0.000133441		FA	0.930895	1.06654	0.998711
MA	0.0238658	0.0295296	0.0267772		MA	0.455971	0.785153	0.84795		MA	0.000273284	0.000343893	0.000337488		MA	1.10508	1.26978	0.878687
Pr	0.726796	0.503586	0.521686		Pr	1.82598	1.18004	1.01979		Pr	0	0	0		Pr	0.233679	0.185001	0.115388
Ab	0.134615	0.0710703	0.12933		Ab	0.000156358	0.00026256	3.32866e-05		Ab	0	0	0		Ab	0.115614	0.230848	0.264569
Le	0.00368379	0.00283937	0.00241418		Le	0.0998246	0.0402292	0.108317		Le	0.000563168	0.000912613	0.000750416		Le	0.84077	0.404378	0.469059
Wi	0.00711078	0.0121457	0.00460063		Wi	0.0993248	0.0193245	0.0626549		Wi	0.00118439	0.00101759	0.000618457		Wi	1.04763	0.865395	0.960769
OBP5					OBP17					CSP6					CSP18
FA	8.3978	6.01247	3.65022		FA	0.2136	0.271466	0.360631		FA	0.429044	0.787151	0.52435		FA	0.0139312	0.0215986	0.0203947
MA	4.40676	10.3517	5.93574		MA	0.676127	0.566376	0.329567		MA	0.985991	0.380123	0.629329		MA	0.00678483	0.00395055	0.00302108
Pr	1.38209	0.982814	0.684865		Pr	0.0149737	0.00901134	0.00666179		Pr	0.000790029	0.00104051	0.000806392		Pr	0	0	0
Ab	0.273891	0.122957	0.153748		Ab	0.000783459	0.000628824	0.000672524		Ab	0.000322267	0.00017376	0.000203578		Ab	0	0	0
Le	0.809694	0.230551	0.660322		Le	0.00275267	0.00123813	0.00357266		Le	0.019703	0.0261267	0.0151945		Le	0.00214224	0.00269602	0.00611486
Wi	1.34763	0.403703	1.23062		Wi	0.00550281	0.00388873	0.00755363		Wi	0.0199845	0.0161036	0.0172448		Wi	0.000423365	0.000332079	0.000290262
OBP6					OBP18					CSP7					CSP19
FA	5.19079	9.60431	5.22822		FA	0.00209541	0.00121482	0.00121277		FA	0.882047	1.0072	0.383681		FA	7.10983	13.0293	15.3485
MA	15.2875	7.06	11.556		MA	0.00108767	0.00235061	0.00143029		MA	1.85572	3.27644	1.3252		MA	15.7452	12.9947	10.3277
Pr	0.125455	0.0836564	0.0357514		Pr	0.00543539	0.00316944	0.00597778		Pr	0.092201	0.0965958	0.133609		Pr	16.4245	19.2001	9.67261
Ab	0.0026019	0.000957069	0.0024046		Ab	0	0	0		Ab	0.0287138	0.0460217	0.0144995		Ab	6.46991	2.40708	2.42566
Le	0.00367989	0.00478386	0.00218957		Le	0.00497898	0.00356307	0.00380962		Le	1.39298	0.746731	1.55071		Le	43.9957	19.8525	35.3528
Wi	0.00383129	0.0028088	0.00357881		Wi	0.0148867	0.0131087	0.0100731		Wi	4.2505	2.52589	3.12462		Wi	43.1409	36.2901	34.2917
OBP7					OBP19					CSP8					CSP20
FA	0.0294341	0.0565503	0.0595786		FA	0.000853371	0.000735168	0.000521436		FA	0.335203	0.109801	0.273069		FA	0.000157433	0.000401933	0.000157919
MA	0.0627173	0.0671972	0.0366719		MA	0.000198898	0.000240815	0.000521619		MA	0.429724	0.83747	0.308632		MA	0.00153937	0.000947481	0.00256554
Pr	0.00626251	0.00238575	0.00541938		Pr	0.000377878	0.0003646	0.000260308		Pr	4.45214	3.19023	3.54509		Pr	0.0853482	0.0640113	0.0551341
Ab	0.0343955	0.0150953	0.0189601		Ab	0	0	0		Ab	3.2343	1.26583	2.60513		Ab	0.0148198	0.00555119	0.0120798
Le	0.0844934	0.0504838	0.0798434		Le	0	0	0		Le	1.28011	0.693396	2.4127		Le	0.003632	0.0017508	0.00254167
Wi	0.0165645	0.0269083	0.0238789		Wi	0	0	0		Wi	6.44246	5.26879	14.545		Wi	0.0109636	0.00851625	0.00561132
