# Supplementary material for: Molecular identification and expression patterns of odorant binding protein and chemosensory protein genes in Athetis lepigone (Lepidoptera: Noctuidae)
Source: PeerJ. 2017 Mar 30;5:e3157. doi: 10.7717/peerj.3157 (PMC5376112; doi:10.7717/peerj.3157)
Supplement: Table S2 [file peerj-05-3157-s003.xls]

## Sheet: Sheet1
Table S2. Primers used for qRT-PCR
Purpose	Forward (5'-3')	Reverse (5'-3')	Purpose	Forward (5'-3')	Reverse (5'-3')
OBP			CSP
GOBP1	CTGACGGAGGAGAAGATG	GTAAGCAGGTTGAAGTAGTTG	CSP1	GCCGTATTCCTTCTCTGT	TTCAGTTCCTTGCCATCA
GOBP2	AGGGAAGAGTCAGGGTTA	CAGGGAGAACTTGTTGGA	CSP2	AGACATCTTGCGGTAAGT	CTTCAGGGTCGTTCTTCT
PBP1	ATCCAAGATGGCAGTTCA	AACCTTCGTAAACCCTGTA	CSP3	CCTGAAGTGATAGCAACATC	GACGAACTCAGTGAAGGA
PBP2	GGTAGAATCTTCGCAGGA	CAGAAGTTGTAGAAGTCAGTC	CSP4	GCCTACCACCACTATGAG	TGGAATAAGGAATCGGAAGT
PBP3	GTATATCACTTCAGGATTCGTTAA	TCCAAGAGGTCCAACTTC	CSP5	AAGTGTACTCGTGGCAATA	GCTTTACTATACCCTAAGAAACTC
OBP1	AGCAGCCTCAATAGCATT	ATCGTTCACAGCCTTTCT	CSP6	AGACATCTACTTACACCACAA	TTCAACTCCTTGCCATCT
OBP2	ATCTGGATTCCTGACTGAC	GCAAGTGAACACATCATAGG	CSP7	AAGTGCTAGTAGTGTTACCA	TCTGGCTCAGTTCTTTGT
OBP3	AAGCAGGCTGATTTATTACTAC	GCATTTGGTGAGGTGAAA	CSP8	CTGGCTCTGACAAAGTTATC	TGACTGCTTCAATCTTATTCTT
OBP4	AACTCTCGCAGATGATGAA	AGCATTATCCTTGTCAACAC	CSP9	GAAGATAAGTACACCGACAAG	CTTTCTCCAAGACACAGTTG
OBP5	TGTGTTTAGTGGCTGCTA	CTTGGCTGACTCAATATCTTC	CSP10	TGGTTCCGTACATCAAGT	AGTAGTCCTGTTCCTTAGC
OBP6	GAGATGGACGAGGACATG	CACTTGATGTAGCACTTGAG	CSP11	CCAGACACATACGACACT	AGGCGAGCATTTACTACA
OBP7	AGAAGGTGCGACAAGATAA	AGAAGTAAATCAGCGTGTTG	CSP12	CTATGTGAAGTGCCTCCT	GCTCGTTCCAGTAGTCTT
OBP8	AACGAACACGGACAATTATC	CGCTGACTTCAACATCATT	CSP13	AGACGCCATCATTCAGAA	ATGCCGAGGAGTAGTGTA
OBP9	ACAGATGAACAGAAGGAGAA	TTCCGTCTTGTAGTCACC	CSP14	GAATGTAATCTCTACCAACCAA	GGCTACTACCTCGTTAATGT
OBP10	CGTCAGCAGTACAACAAG	AACTCGCTTCAGTAGACC	CSP15	GTATTGTCGTGTATGTTGGT	CAGTTGATGTAAGCCTTGAG
OBP11	CGCTTATGCCGATGAATC	GTCTATACTCTGCTCCTCAA	CSP16	CAGAATCGTAGACTGTTGAAG	TCTTACACGCTGTTGCTA
OBP12	TGGCAGAGGAGGATATAAC	ACAACATCATCGTCGTCTA	CSP17	TATGACAATGTGAACCTGAAC	TCCTCCTCTAAAGCCTCT
OBP13	CACTCTTGAAGGTCTGGT	GTCCATAGGCACAGTTCT	CSP18	CGACCTGGATACTCTCAA	AGAAGGAACTTGTGGAAGA
OBP14	ACGCCAGATGTGATATACA	GCTTGTCGCATTCATTAGA	CSP19	GATGTGCGAAATGTACTGAA	TTCCATGCCTCTTGGTATT
OBP15	TATGGATGAGAGCGGTATG	CGCAGGAATGAAGGTAATC	CSP20	GCAAACGACTCAAGACTC	CCGCATATTGACGAACTATT
OBP16	AGCGACGGTAAGATTGAT	ACATTCCTCTCCAACAGTT	Reference gene
OBP17	ATCTCCTCGCATTGACAA	GTTCCATAGCCTTCGTAATC	GAPDH	ATCTTACAAGGTCATCTCCAA	GTCCATCCACAGTCTTCT
OBP18	GCAGTTACCGAAGAAGAGA	CACAACCTAAGAAGCAAGAC	EF	GGAGGAACTATGCTGAGAA	AAGGTTGACATCGGCTAA
OBP19	AAATGCCAAGAAGGTGTTT	CTTTATTCCCATCACTCGTAG
OBP20	ACTCCTATTATCTATGGTTCTGA	GCTCATCACATCTAAGACATT
OBP21	GTTCAAGTCCAGTGTTGTATA	GGAAGCGAGGTCATCTAT
OBP22	CGAAGAATGGCTTAACAGAA	TCCACTTGTCTAACCATCAT
OBP23	TGTTATGAACGCTCAAGGA	AATATCAATGCTGCTCTATCAC
